# Supplementary material for: Wastewater Treatment System Optimization for Sustainable Operation of the SHARON–Anammox Process under Varying Carbon/Nitrogen Loadings
Source: MDPI journal article supplement (doi:10.3390/w15224015), 2023-11-19
Supplement: s1 [file s1]

# **Wastewater Treatment System Optimization for Sustainable Operation of the SHARON–Anammox Process under Varying Carbon/Nitrogen Loadings**

Paulina Vilela <sup>1,\*</sup>, Kijeon Nam <sup>2</sup> and Changkyoo Yoo <sup>2,\*</sup>

## **Supplementary Materials**

**Number of pages: 25**

**Number of tables: 9**

**Number of figures: 5**

## **Table of Contents**

|                                                                                                                                                                                                    |   |
|----------------------------------------------------------------------------------------------------------------------------------------------------------------------------------------------------|---|
| <b>1. Methods</b> .....                                                                                                                                                                            | 3 |
| <b>1.1. BSM2-SHAMX model</b> .....                                                                                                                                                                 | 3 |
| Figure S1. Long term influent profiles for the BSM2-SHAMX model. (a) Influent flowrate profile for a 153d operation horizon. (b) Influent concentrations profile for a 153d operation horizon..... | 5 |
| Figure S2. BSM2-SHAMX plant configuration represented in Simulink-MATLAB. ....                                                                                                                     | 5 |
| <b>1.1.1. Benchmark simulation model No. 2</b> .....                                                                                                                                               | 5 |
| <b>1.1.2. Stoichiometries and kinetics of BSM2-SHAMX</b> .....                                                                                                                                     | 6 |
| Table S1. Model components of ASM1 at BSM2 [3,6]. ....                                                                                                                                             | 6 |
| Table S2. Model components of SHARON process at BSM2-SHAMX. Adapted from [2]......                                                                                                                 | 6 |
| Table S3. Model components of Anammox process at BSM2-SHAMX. Adapted from [2]......                                                                                                                | 7 |

|                                                                                                                                                                                                                                                                                                                                                                                                    |    |
|----------------------------------------------------------------------------------------------------------------------------------------------------------------------------------------------------------------------------------------------------------------------------------------------------------------------------------------------------------------------------------------------------|----|
| Table S4. Kinetic parameter values of SHARON and Anammox in the BSM2-SHAMX model. Adapted from [2].                                                                                                                                                                                                                                                                                                | 7  |
| Table S5. Petersen matrix of the ASM1 model. Adapted from [2].                                                                                                                                                                                                                                                                                                                                     | 10 |
| Table S6. Petersen matrix of the of the SHARON model. Adapted from [2].                                                                                                                                                                                                                                                                                                                            | 11 |
| Table S7. Petersen matrix of the Anammox model. Adapted from [2].                                                                                                                                                                                                                                                                                                                                  | 12 |
| <b>1.2. SHARON and Anammox model calibration</b>                                                                                                                                                                                                                                                                                                                                                   | 13 |
| Table S8. Kinetic parameter value ranges for calibration of ASM model in BSM2-SHAMX.                                                                                                                                                                                                                                                                                                               | 13 |
| Table S9. Calibrated kinetic parameters of ASM model in BSM2-SHAMX.                                                                                                                                                                                                                                                                                                                                | 15 |
| <b>1.3. Control performance assessment</b>                                                                                                                                                                                                                                                                                                                                                         | 15 |
| <b>1.3.1. First level assessment</b>                                                                                                                                                                                                                                                                                                                                                               | 15 |
| <b>1.3.2 Second level assessment</b>                                                                                                                                                                                                                                                                                                                                                               | 16 |
| <b>1.3.2.1 Controlled variable performance</b>                                                                                                                                                                                                                                                                                                                                                     | 16 |
| <b>1.3.2.2 Manipulated variable performance</b>                                                                                                                                                                                                                                                                                                                                                    | 17 |
| <b>1.3.3 Operational cost</b>                                                                                                                                                                                                                                                                                                                                                                      | 18 |
| <b>1.4. Sensitivity analysis</b>                                                                                                                                                                                                                                                                                                                                                                   | 19 |
| <b>1.5. Controllers</b>                                                                                                                                                                                                                                                                                                                                                                            | 21 |
| Figure S3. General layout of a PID controller [5].                                                                                                                                                                                                                                                                                                                                                 | 23 |
| <b>1.5.1. Model predictive control</b>                                                                                                                                                                                                                                                                                                                                                             | 23 |
| Figure S4. Receding horizon principle of MPC. Adapted from [24,25].                                                                                                                                                                                                                                                                                                                                | 23 |
| <b>1.5.2. Control strategy scenarios C1 and C2</b>                                                                                                                                                                                                                                                                                                                                                 | 24 |
| Figure S5. Block diagram of the proposed single loop control strategy (scenario C1 and C2).<br>(a) The control loop calculates the dissolved oxygen concentration ( $S_o$ ) at the set point given $S_{o,sp}$ and tracks the $S_o$ set point by adjusting the $k_{La}$ of the system. (b) The control loop compensates the errors of $S_o$ measurement to attain to the desired $NO_2/NH_4$ ratio. | 24 |
| <b>References</b>                                                                                                                                                                                                                                                                                                                                                                                  | 24 |

## 1. Methods

### 1.1. BSM2-SHAMX model

The influent flowrate and concentrations utilized in the BSM2-SHAMX model are presented in Figure S1. The plant's design is adapted from Alex et al. [1] and Volcke et al. [2]. The plant is composed by a primary clarifier with a volume of 900 m<sup>3</sup>, five biological reactors with a volume of 1500 m<sup>3</sup> each non-aerated reactor and 3000 m<sup>3</sup> each aerated reactor, secondary clarifier with a volume of 6000 m<sup>3</sup>, a thickener, anaerobic digester, dewatering unit [1], followed by the SHARON reactor with a volume of 338 m<sup>3</sup> and Anammox reactor with a volume of 75 m<sup>3</sup> [2]. The model uses an average influent dry-weather flow rate of 20,648.36 m<sup>3</sup>/d, average biodegradable COD in the influent concentration of 592.53 g/m<sup>3</sup> [1]. The SHARON reactor is developed as a continuously stirred tank reactor (CSTR), with a hydraulic retention time (HRT) of 24 hours [2], while the HRT of the BSM2 model is 22 hours based on the influent flowrate and total reactors volume [1]. The plant model configuration presented in this study is shown in Figure S2.

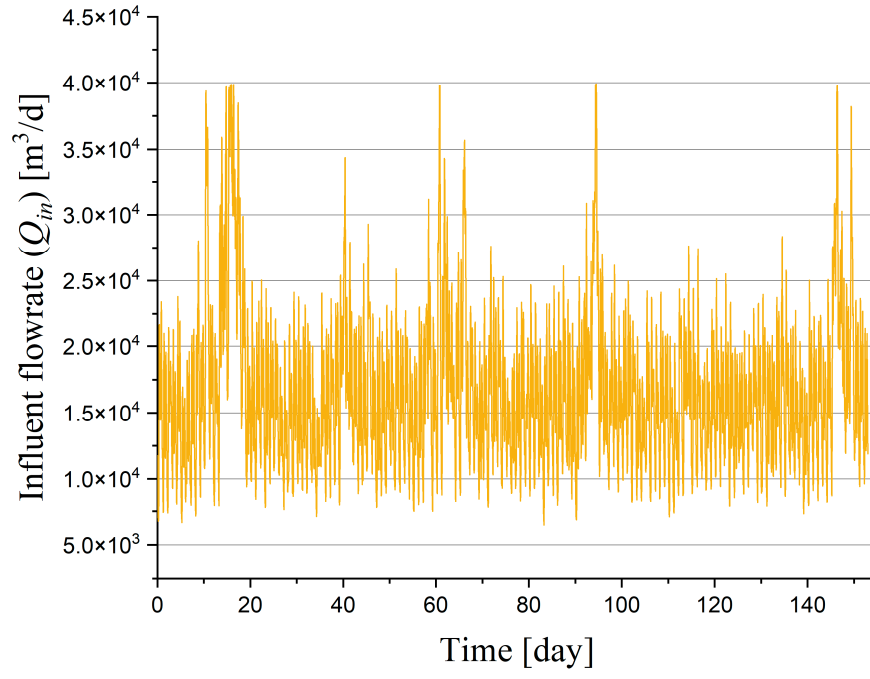

(a)

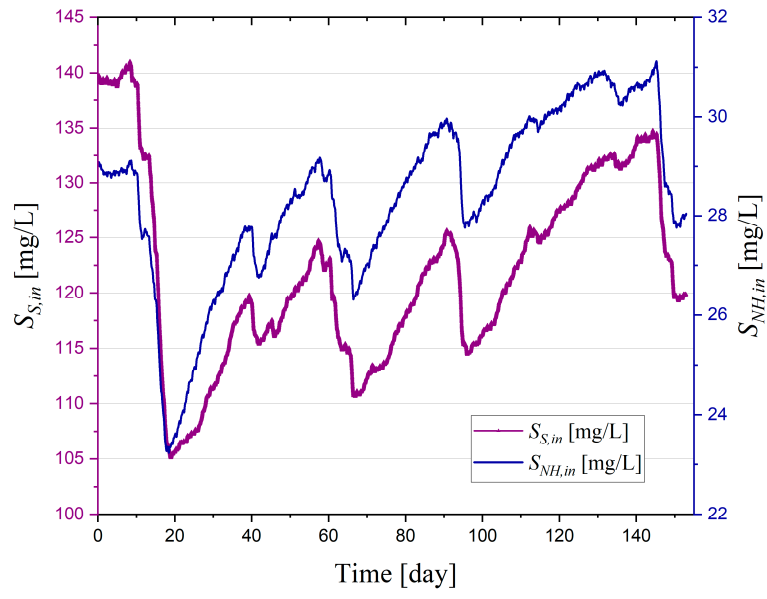

(b)

Figure S1. Long term influent profiles for the BSM2-SHAMX model. (a) Influent flowrate profile for a 153d operation horizon. (b) Influent concentrations profile for a 153d operation horizon.

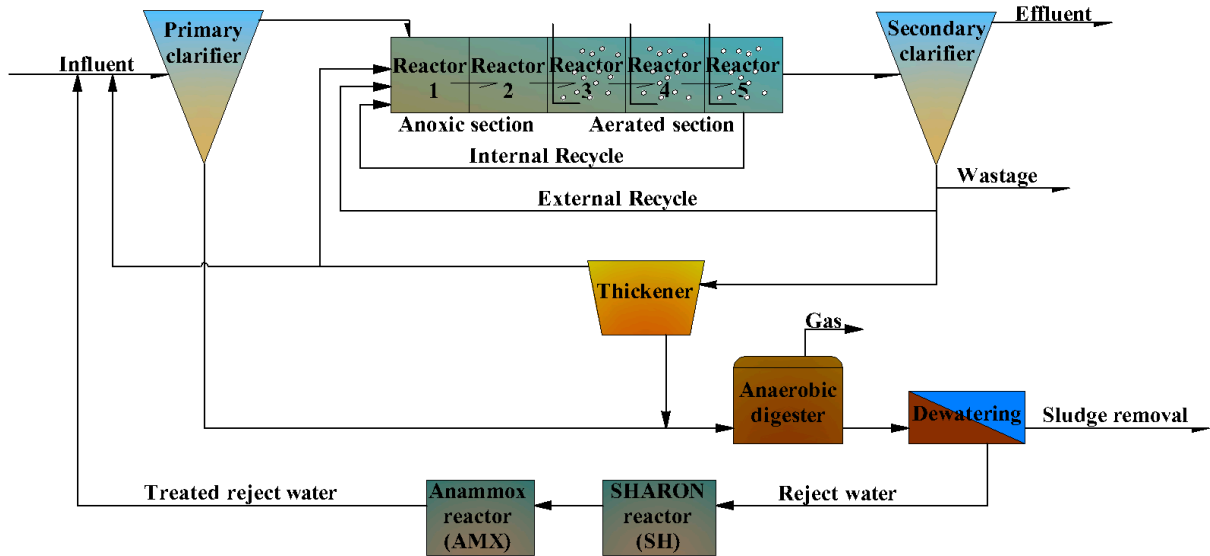

Figure S2. BSM2-SHAMX plant configuration represented in Simulink-MATLAB.

### 1.1.1. Benchmark simulation model No. 2

The Benchmark Simulation Model No. 2 (BSM2) is a wastewater modeling methodology that portrays a common layout of a real wastewater treatment plant (WWTP) [3]. BSM2 configuration encloses an environment for simulation, influent loadings, test procedure, and evaluation criteria [3,4]. These variables guide most of the reactions and rate coefficients occurring in the treatment system presenting variations for the factors of plant configuration, operating conditions, microorganism population dynamics, composition of the influent wastewater load, pH, among others. Thus, several simplifications and assumptions were made for the BSM2 modeling, in both physical and mathematical model structure. The pH being one of the most important was considered to remain constant, and by restriction of the mathematical model it was controlled by the

alkalinity measure (  $S_{alk}$  ) [3]. In addition, the influent data of the WWTP from the International Water Association (IWA) Task Group report of the BSM2 groups static and dynamic seven-day data for three weather conditions: storm, rain, and dry conditions [3,5].

### 1.1.2. Stoichiometries and kinetics of BSM2-SHAMX

Table S1. Model components of ASM1 at BSM2 [3,6].

| No. | State variables (components)                        | Symbol    | Unit                            |
|-----|-----------------------------------------------------|-----------|---------------------------------|
| 1   | Soluble undegradable organics                       | $S_I$     | mg COD/L                        |
| 2   | Soluble biodegradable organics                      | $S_S$     | mg COD/L                        |
| 3   | Particulate undegradable organics                   | $X_I$     | mg COD/L                        |
| 4   | Particulate biodegradable organics                  | $X_S$     | mg COD/L                        |
| 5   | Active heterotrophic biomass                        | $X_{BH}$  | mg COD/L                        |
| 6   | Active autotrophic biomass                          | $X_{BA}$  | mg COD/L                        |
| 7   | Particulate undegradable endogenous products        | $X_P$     | mg COD/L                        |
| 8   | Dissolved oxygen                                    | $S_O$     | mg COD/L                        |
| 9   | Nitrate and nitrite ( $\text{NO}_3 + \text{NO}_2$ ) | $S_{NO}$  | mg N/L                          |
| 10  | Ammonia ( $\text{NH}_4 + \text{NH}_3$ )             | $S_{NH}$  | mg N/L                          |
| 11  | Soluble biodegradable organic N                     | $S_{ND}$  | mg N/L                          |
| 12  | Particulate biodegradable organic N                 | $X_{ND}$  | mg N/L                          |
| 13  | Alkalinity                                          | $S_{ALK}$ | mol $\text{HCO}_3^-/\text{m}^3$ |
| 14  | Total suspended solids                              | $TSS$     | mg TSS/L                        |
| 15  | Flowrate                                            | $Q$       | mg/L                            |

Table S2. Model components of SHARON process at BSM2-SHAMX. Adapted from [2].

| No. | State variables (components) | Symbol   | Unit               |
|-----|------------------------------|----------|--------------------|
| 1   | Total ammonium               | $S_{NH}$ | mole/ $\text{m}^3$ |
| 2   | Total nitrite                | $TNO_2$  | mole/ $\text{m}^3$ |
| 3   | Total inorganic carbon       | $TIC$    | mole/ $\text{m}^3$ |
| 4   | Total inorganic phosphorus   | $TIP$    | mole/ $\text{m}^3$ |

|    |                            |           |                     |
|----|----------------------------|-----------|---------------------|
| 5  | Total nitrate              | $S_{NO}$  | mole/m <sup>3</sup> |
| 6  | Dissolved oxygen           | $S_O$     | mole/m <sup>3</sup> |
| 7  | Nitrogen gas               | $N_2$     | mole/m <sup>3</sup> |
| 8  | Ammonium oxidizing biomass | $X_{NH}$  | mole/m <sup>3</sup> |
| 9  | Nitrite oxidizing biomass  | $X_{NO2}$ | mole/m <sup>3</sup> |
| 10 | Heterotrophic biomass      | $X_{bh}$  | mole/m <sup>3</sup> |
| 11 | Methanol                   | $CH_3OH$  | mole/m <sup>3</sup> |
| 12 | Protons                    | $H^+$     | mole/m <sup>3</sup> |

Table S3. Model components of Anammox process at BSM2-SHAMX. Adapted from [2].

| No. | State variables (components)            | Symbol    | Unit                            |
|-----|-----------------------------------------|-----------|---------------------------------|
| 1   | Dissolved oxygen                        | $S_O$     | gO <sub>2</sub> /m <sup>3</sup> |
| 2   | Readily biodegradable substrate         | $S_S$     | gCOD/m <sup>3</sup>             |
| 3   | Total ammonium                          | $S_{NH}$  | gN/m <sup>3</sup>               |
| 4   | Total nitrite                           | $TNO_2$   | gN/m <sup>3</sup>               |
| 5   | Total nitrate                           | $TNO_3$   | gN/m <sup>3</sup>               |
| 6   | Nitrogen gas                            | $N_2$     | gN/m <sup>3</sup>               |
| 7   | Heterotrophic biomass                   | $X_{bh}$  | gCOD/m <sup>3</sup>             |
| 8   | Ammonium oxidizing biomass              | $X_{NH}$  | gCOD/m <sup>3</sup>             |
| 9   | Nitrite oxidizing biomass               | $X_{NO2}$ | gCOD/m <sup>3</sup>             |
| 10  | Anammox biomass                         | $X_{AN}$  | gCOD/m <sup>3</sup>             |
| 11  | Slowly biodegradable substrate          | $X_S$     | gCOD/m <sup>3</sup>             |
| 12  | Particulate products from biomass decay | $X_P$     | gCOD/m <sup>3</sup>             |
| 13  | Alkalinity                              | $S_{alk}$ | mole/m <sup>3</sup>             |

Table S4. Kinetic parameter values of SHARON and Anammox in the BSM2-SHAMX model. Adapted from [2].

| Parameter                             | Symbol           | Value at 35°C | Unit | Reference |
|---------------------------------------|------------------|---------------|------|-----------|
| Maximum growth rate ammonia oxidizers | $\mu_{max}^{nh}$ | 2.1           | 1/d  | [2]       |

|                                                         |                        |        |                     |         |
|---------------------------------------------------------|------------------------|--------|---------------------|---------|
| Ammonia substrate saturation for ammonia oxidizers      | $K_{NH_3}^{nh}$        | 0.054  | mole/m <sup>3</sup> | [2,7,8] |
| Oxygen substrate saturation for ammonia oxidizers       | $K_{i,TNO_2}^{nh}$     | 0.029  | mole/m <sup>3</sup> | [2,7,8] |
| Maximum growth rate nitrite oxidizers                   | $\mu_{max}^{nit}$      | 0.146  | 1/d                 | [2]     |
| Nitrous acid substrate saturation for nitrite oxidizers | $K_{TNO_2}^{nit}$      | 1.05   | mole/m <sup>3</sup> | [2,7,8] |
| Oxygen substrate saturation for nitrite oxidizers       | $K_{S_O}^{nit}$        | 0.019  | mole/m <sup>3</sup> | [2,7,8] |
| Maximum growth rate nitrite denitrifiers                | $\mu_{max}^{dTNO_2}$   | 0.034  | 1/d                 | [2]     |
| Nitrite substrate saturation for nitrite denitrifiers   | $K_{TNO_2}^{dTNO_2}$   | 0.009  | mole/m <sup>3</sup> | [2,7,8] |
| Methanol substrate saturation during denitrification    | $K_{CH_3OH}^{bh,an}$   | 0.52   | mole/m <sup>3</sup> | [2,7,8] |
| Oxygen 'inhibition constant' for denitrifiers           | $K_{i,S_O}$            | 0.006  | mole/m <sup>3</sup> | [2,7,8] |
| Maximum growth rate nitrate denitrifiers                | $\mu_{max}^{dS_{NO}}$  | 1.5    | 1/d                 | [2]     |
| Nitrate substrate saturation for nitrate denitrifiers   | $K_{S_{NO}}^{dS_{NO}}$ | 0.01   | mole/m <sup>3</sup> | [2,7,8] |
| Maximum growth rate methanol oxidizers                  | $\mu_{max}^{CH_3OH}$   | 2.5    | 1/d                 | [2]     |
| Methanol substrate saturation during aerobic growth     | $K_{CH_3OH}^{bh,aer}$  | 2.08   | mole/m <sup>3</sup> | [2,7,8] |
| Oxygen substrate saturation for methanol oxidizers      | $K_{S_O}^{bh}$         | 0.0025 | mole/m <sup>3</sup> | [2,7,8] |



|                                          |               |     |     |     |
|------------------------------------------|---------------|-----|-----|-----|
| Maximum growth rate<br>ammonia oxidizers | $\mu_{max}^n$ | 2.1 | 1/d | [2] |
|------------------------------------------|---------------|-----|-----|-----|

Table S5. Petersen matrix of the ASM1 model. Adapted from [2].

| N<br>o. | State<br>variables<br>(components)              | Symbol   | Components transformations |          |            |               |                         |                   |                   |                      |                      |           |           |           |                  |
|---------|-------------------------------------------------|----------|----------------------------|----------|------------|---------------|-------------------------|-------------------|-------------------|----------------------|----------------------|-----------|-----------|-----------|------------------|
|         |                                                 |          | $S_O$                      | $S_{NH}$ | $S_{NO}$   | $X_{bh}$      | $X_{ba}$ to AOB and NOB | $S_s$ to $CH_3OH$ | $X_s$ to $CH_3OH$ | $S_{ND}$ to $S_{NH}$ | $X_{ND}$ to $S_{NH}$ | $S_I$     | $X_I$     | $X_P$     | $S_{alk}$ to TIC |
| 1       | Soluble inert organic matter                    | $S_I$    | 0                          | 0        | 0          | 0             | 0                       | 0                 | 0                 | 0                    | 0                    | <b>-1</b> | 0         | 0         | 0                |
| 2       | Readily biodegradable substrate                 | $S_S$    | 0                          | 0        | 0          | 0             | 0                       | 0                 | 0                 | 0                    | 0                    | 0         | <b>-1</b> | 0         | 0                |
| 3       | Particulate inert organic matter                | $X_I$    | 0                          | 0        | 0          | 0             | 0                       | <b>-1</b>         | 0                 | 0                    | 0                    | 0         | 0         | 0         | 0                |
| 4       | Slowly biodegradable substrate                  | $X_S$    | 0                          | 0        | 0          | 0             | 0                       | 0                 | <b>-1</b>         | 0                    | 0                    | 0         | 0         | 0         | 0                |
| 5       | Active heterotrophic biomass                    | $X_{bh}$ | 0                          | 0        | 0          | <b>-34.58</b> | 0                       | 0                 | 0                 | 0                    | 0                    | 0         | 0         | 0         | 0                |
| 6       | Active autotrophic biomass                      | $X_{ba}$ | 0                          | 0        | 0          | 0             | <b>-34.58</b>           | 0                 | 0                 | 0                    | 0                    | 0         | 0         | 0         | 0                |
| 7       | Particulate products arising from biomass decay | $X_P$    | 0                          | 0        | 0          | 0             | 0                       | 0                 | 0                 | 0                    | 0                    | 0         | 0         | <b>-1</b> | 0                |
| 8       | Oxygen                                          | $S_O$    | <b>-32</b>                 | 0        | 0          | 0             | 0                       | 0                 | 0                 | 0                    | 0                    | 0         | 0         | 0         | 0                |
| 9       | Nitrate and nitrite nitrogen                    | $S_{NO}$ | 0                          | 0        | <b>-14</b> | 0             | 0                       | 0                 | 0                 | 0                    | 0                    | 0         | 0         | 0         | 0                |

|    |                                                         |           |   |            |   |              |              |                |                |            |            |   |   |           |
|----|---------------------------------------------------------|-----------|---|------------|---|--------------|--------------|----------------|----------------|------------|------------|---|---|-----------|
| 10 | NH <sub>4</sub> <sup>+</sup> + NH <sub>3</sub> nitrogen | $S_{NH}$  | 0 | <b>-14</b> | 0 | <b>-0.02</b> | <b>-0.02</b> | <b>-0.05</b>   | <b>-0.05</b>   | 0          | 0          | 0 | 0 | 0         |
| 11 | Soluble biodegradable organic nitrogen                  | $S_{ND}$  | 0 | 0          | 0 | 0            | 0            | 0              | 0              | <b>-14</b> | 0          | 0 | 0 | 0         |
| 12 | Particulate biodegradable organic nitrogen              | $X_{ND}$  | 0 | 0          | 0 | 0            | 0            | 0              | 0              | 0          | <b>-14</b> | 0 | 0 | 0         |
| 13 | Alkalinity                                              | $S_{alk}$ | 0 | 0          | 0 | <b>0.05</b>  | <b>0.05</b>  | <b>-0.0002</b> | <b>-0.0002</b> | 0          | 0          | 0 | 0 | <b>-1</b> |

Table S6. Petersen matrix of the of the SHARON model. Adapted from [2].

| No | State variables (components)     | Symbol     | Components transformations |           |              |           |           |            |           |                   |           |           |       |                    |
|----|----------------------------------|------------|----------------------------|-----------|--------------|-----------|-----------|------------|-----------|-------------------|-----------|-----------|-------|--------------------|
|    |                                  |            | $S_N$<br>$H$               | $TNO_2$   | $S_N$<br>$O$ | $S_O$     | $X_{NH}$  | $X_{NO_2}$ | $X_{bh}$  | $CH_3OH$ to $S_S$ | $S_I$     | $X_I$     | $X_P$ | $TIC$ to $S_{alk}$ |
| 1  | Total ammonium                   | $S_{NH}$   | <b>-1</b>                  | 0         | 0            | 0         | 0         | 0          | 0         | 0                 | 0         | 0         | 0     | 0                  |
| 2  | Total nitrite                    | $TNO_2$    | 0                          | <b>-1</b> | 0            | 0         | 0         | 0          | 0         | 0                 | 0         | 0         | 0     | 0                  |
| 3  | Total inorganic carbon           | $TIC$      | 0                          | 0         | 0            | 0         | 0         | 0          | 0         | 0                 | 0         | 0         | 0     | <b>-1</b>          |
| 4  | Total nitrate                    | $S_{NO}$   | 0                          | 0         | <b>-1</b>    | 0         | 0         | 0          | 0         | 0                 | 0         | 0         | 0     | 0                  |
| 5  | Dissolved oxygen                 | $S_O$      | 0                          | 0         | 0            | <b>-1</b> | 0         | 0          | 0         | 0                 | 0         | 0         | 0     | 0                  |
| 6  | Ammonium oxidizing biomass       | $X_{NH}$   | 0                          | 0         | 0            | 0         | <b>-1</b> | 0          | 0         | 0                 | 0         | 0         | 0     | 0                  |
| 7  | Nitrite oxidizing biomass        | $X_{NO_2}$ | 0                          | 0         | 0            | 0         | 0         | <b>-1</b>  | 0         | 0                 | 0         | 0         | 0     | 0                  |
| 8  | Heterotrophic biomass            | $X_{bh}$   | 0                          | 0         | 0            | 0         | 0         | 0          | <b>-1</b> | <b>-0.02</b>      | 0         | 0         | 0     | 0                  |
| 9  | Methanol                         | $CH_3OH$   | 0                          | 0         | 0            | 0         | 0         | 0          | 0         | <b>-0.009</b>     | 0         | 0         | 0     | 0                  |
| 10 | Soluble inert organic matter     | $S_I$      | 0                          | 0         | 0            | 0         | 0         | 0          | 0         | 0                 | <b>-1</b> | 0         | 0     | 0                  |
| 11 | Particulate inert organic matter | $X_I$      | 0                          | 0         | 0            | 0         | 0         | 0          | 0         | 0                 | 0         | <b>-1</b> | 0     | 0                  |

|    |                                                 |       |   |   |   |   |   |   |   |   |   |   |   |    |   |
|----|-------------------------------------------------|-------|---|---|---|---|---|---|---|---|---|---|---|----|---|
| 12 | Particulate products arising from biomass decay | $X_P$ | 0 | 0 | 0 | 0 | 0 | 0 | 0 | 0 | 0 | 0 | 0 | -1 | 0 |
|----|-------------------------------------------------|-------|---|---|---|---|---|---|---|---|---|---|---|----|---|

Table S7. Petersen matrix of the Anammox model. Adapted from [2].

| No | State variables (components)                            | Symbo<br>l | Components transformations |       |          |       |          |       |       |          |         |          |            |          |       |       |           |
|----|---------------------------------------------------------|------------|----------------------------|-------|----------|-------|----------|-------|-------|----------|---------|----------|------------|----------|-------|-------|-----------|
|    |                                                         |            | $S_O$                      | $S_S$ | $S_{NH}$ | $N_2$ | $X_{bh}$ | $X_S$ | $X_P$ | $S_{NO}$ | $TNO_2$ | $X_{NH}$ | $X_{NO_2}$ | $X_{AN}$ | $S_I$ | $X_I$ | $S_{alk}$ |
| 1  | Oxygen                                                  | $S_O$      | -1                         | 0     | 0        | 0     | 0        | 0     | 0     | 0        | 0       | 0        | 0          | 0        | 0     | 0     | 0         |
| 2  | Readily biodegradable substrate                         | $S_S$      | 0                          | -1    | 0        | 0     | 0        | 0     | 0     | 0        | 0       | 0        | 0          | 0        | 0     | 0     | 0         |
| 3  | NH <sub>4</sub> <sup>+</sup> + NH <sub>3</sub> nitrogen | $S_{NH}$   | 0                          | 0     | -1       | 0     | 0        | 0     | 0     | 0        | 0       | 0        | 0          | 0        | 0     | 0     | 0         |
| 4  | Total nitrite                                           | $TNO_2$    | 0                          | 0     | 0        | 0     | 0        | 0     | 0     | -1       | 0       | 0        | 0          | 0        | 0     | 0     | 0         |
| 5  | Total nitrate                                           | $S_{NO}$   | 0                          | 0     | 0        | 0     | 0        | 0     | 0     | -1       | 0       | 0        | 0          | 0        | 0     | 0     | 0         |
| 6  | Nitrogen gas                                            | $N_2$      | 0                          | 0     | 0        | -1    | 0        | 0     | 0     | 0        | 0       | 0        | 0          | 0        | 0     | 0     | 0         |
| 7  | Active heterotrophic biomass                            | $X_{bh}$   | 0                          | 0     | 0        | 0     | -1       | 0     | 0     | 0        | 0       | 0        | 0          | 0        | 0     | 0     | 0         |
| 8  | Ammonium oxidizing biomass                              | $X_{NH}$   | 0                          | 0     | 0        | 0     | 0        | 0     | 0     | 0        | -1      | 0        | 0          | 0        | 0     | 0     | 0         |
| 9  | Nitrite oxidizing biomass                               | $X_{NO_2}$ | 0                          | 0     | 0        | 0     | 0        | 0     | 0     | 0        | 0       | -1       | 0          | 0        | 0     | 0     | 0         |
| 10 | Anammox biomass                                         | $X_{AN}$   | 0                          | 0     | 0        | 0     | 0        | 0     | 0     | 0        | 0       | 0        | -1         | 0        | 0     | 0     | 0         |
| 11 | Slowly biodegradable substrate                          | $X_S$      | 0                          | 0     | 0        | 0     | 0        | -1    | 0     | 0        | 0       | 0        | 0          | 0        | 0     | 0     | 0         |
| 12 | Particulate products arising from biomass decay         | $X_P$      | 0                          | 0     | 0        | 0     | 0        | 0     | -1    | 0        | 0       | 0        | 0          | 0        | 0     | 0     | 0         |
| 13 | Alkalinity                                              | $S_{alk}$  | 0                          | 0     | 0        | 0     | 0        | 0     | 0     | 0        | 0       | 0        | 0          | 0        | 0     | 0     | -1        |
| 14 | Soluble inert organic matter                            | $S_I$      | 0                          | 0     | 0        | 0     | 0        | 0     | 0     | 0        | 0       | 0        | 0          | -        | 0     | 0     | 0         |
| 15 | Particulate inert organic matter                        | $X_I$      | 0                          | 0     | 0        | 0     | 0        | 0     | 0     | 0        | 0       | 0        | 0          | 0        | 0     | -1    | 0         |

## 1.2. SHARON and Anammox model calibration

In the model calibration, the parameters into the model can be tuned to best follow experimental data. For calibration, the data for the model-based WWTP was obtained from literature [3,9–13], where each process data was adapted to the SHAMX in the model. The conditions of each study are analyzed to apply to the SHAMX model presented in this study. Next, a deduction of the model parameters is done to fit the experimental data to the model by using the genetic algorithm and bounds of parameters from literature (Table S8). Finally, to verify the parameters' calibration it is needed to calculate the error between the simulated and experimental values obtained. In this study, there sum of squared errors (SSE) and the root mean square error (RMSE) are calculated [5,14].

Table S8. Kinetic parameter value ranges for calibration of ASM model in BSM2-SHAMX.

| Parameter                                       | Symbol   | Value | Value range   | Reference |
|-------------------------------------------------|----------|-------|---------------|-----------|
| Maximum growth rate of heterotrophic biomass    | $\mu_H$  | 1.00  | 0.90 – 1.10   | [9]       |
| Saturation coefficient for organic matter       | $K_S$    | 3.00  | 2.70 – 3.30   |           |
| Heterotrophic saturation coefficient for oxygen | $K_{OH}$ | 0.20  | 1.80 – 0.22   | [3,10]    |
| Saturation coefficient for nitrate              | $K_{NO}$ | 0.50  | 0.45 – 0.55   | [9]       |
| Heterotrophic decay rate                        | $b_h$    | 0.05  | 0.045 – 0.055 | [9,13]    |
| Maximum growth rate of autotrophic biomass      | $\mu_A$  | 0.50  | 0.45 – 0.55   | [3,10]    |

|                                               |           |      |               |           |
|-----------------------------------------------|-----------|------|---------------|-----------|
| Saturation coefficient for ammonia            | $K_{NH}$  | 0.01 | 0.009 – 0.011 | [9,13]    |
| Autotrophic saturation coefficient for oxygen | $K_{O,A}$ | 0.50 | 0.45 – 0.55   | [9]       |
| Autotrophic decay rate                        | $b_A$     | 0.05 | 0.045 – 0.55  | [3,10]    |
| Correction factor for anoxic hydrolysis       | $\eta_g$  | 0.80 | 0.72 – 0.88   |           |
| Ammonification coefficient                    | $k_a$     | 2.00 | 1.80 – 2.20   | [9]       |
| Hydrolysis rate                               | $k_h$     | 3.00 | 2.70 – 3.30   |           |
| Hydrolysis constant                           | $K_X$     | 1.00 | 0.90 – 1.10   |           |
| Heterotrophic yield coefficient               | $Y_H$     | 0.74 | 0.67 – 0.81   | [3,10,11] |
| Autotrophic yield coefficient                 | $Y_A$     | 0.24 | 0.216 – 0.264 |           |
| Fraction of inert product by biomass          | $f_P$     | 0.20 | 0.18 – 0.22   | [11]      |
| Ammonia fraction in biomass                   | $i_{XB}$  | 0.08 | 0.072 – 0.088 | [3,10,12] |
| Ammonia fraction in particulate products      | $i_{XP}$  | 0.06 | 0.054 – 0.066 |           |

---

Table S9. Calibrated kinetic parameters of ASM model in BSM2-SHAMX.

|     | Kinetic parameter | Default |           | Calibrated value |
|-----|-------------------|---------|-----------|------------------|
|     |                   | Value   | Reference |                  |
| COD | $\mu_H$           | 1.00    | [9]       | 0.5377           |
|     | $K_{O,A}$         | 0.50    |           | 1.00             |
|     | $\eta_g$          | 0.80    | [3]       | 0.05             |
| TN  | $\mu_H$           | 1.00    | [9]       | 0.50             |
|     | $K_{NH}$          | 0.01    | [9,13]    | 0.05             |
|     | $K_X$             | 1.00    | [9]       | 0.0109           |
|     | $\eta_g$          | 0.80    | [3]       | 0.05             |
|     | $Y_A$             | 0.24    | [3,11]    | 1.00             |

### 1.3. Control performance assessment

Control performance provides information related to the good performance of the implemented controller. This analysis is divided into two levels. The first level deals with the analysis of effluent quality and further operational cost. The second level refers to an assessment of the local control loops and helps to provide measures of the effect of the control strategies on the plant performance [15].

#### 1.3.1. First level assessment

The performance index is a set of geographically independent measures including an effluent quality measure, energy required for pumping and aeration, and sludge production [3,16]. The effluent quality index (EQI) quantifies the effluent pollution load that discharges to a water body. The following methodology was developed by [15] and is represented in Equation S1.

$$EQI = \frac{1}{1000(t_f - t_0)} \int_{t_0}^{t_f} \left( \beta_{TSS} TSS_e(t) + \beta_{COD} COD_e(t) + \beta_{BOD} BOD_e(t) + \beta_{TKN} TKN_e(t) + \beta_{NO} NO_e(t) \right) Q_e(t) dt \quad (S1)$$

where  $TSS_e$  is the total suspended solids concentration in the effluent,  $COD_e$  is the chemical oxygen demand concentration in the effluent,  $BOD_e$  is the biological oxygen demand concentration in the effluent,  $TKN_e$  is the total Kjeldahl nitrogen, and  $NO_e$  is the total nitrogen concentration in the effluent.  $\beta_{TSS}$ ,  $\beta_{COD}$ ,  $\beta_{BOD}$ ,  $\beta_{TKN}$ , and  $\beta_{NO}$  are the component weighting values, which have the value of 2, 1, 2, 20, and 20, respectively. The weights were taken from [15] based on the Flanders effluent quality formula for calculations of fines.  $t_f$  and  $t_0$  represent the starting and ending time of the evaluation, respectively, and  $Q_e$  is the effluent flowrate.

### 1.3.2 Second level assessment

The second level is divided into two sub-levels to assess the controlled variable performance and the manipulated variable performance.

#### 1.3.2.1 Controlled variable performance

The error presented in the model is calculated using Equation S2 to Equation S7 [3].

$$IAE_i = \int_{t_0}^{t_f} |e_j| dt \quad (S2)$$

$$ISE_j = \int_{t_0}^{t_f} e_j^2 dt \quad (S3)$$

$$\max(Dev_j^{error}) = \max |e_j| \quad (S4)$$

$$Var(e_j) = \overline{e_j^2} - (\overline{e_j})^2 \quad (S5)$$

$$\overline{e_j} = \frac{\int_{t_0}^{t_f} e_j dt}{t_f - t_0} \quad (S6)$$

$$\overline{e_j^2} = \frac{\int_{t_0}^{t_f} e_j^2 dt}{t_f - t_0} \quad (S7)$$



Here,  $IAE_i$  is the integral of the absolute error,  $ISE_j$  is the integral of the squared error,  $\max(Dev_j^{error})$  is the maximum deviation from setpoint,  $Var(e_j)$  is the variance in the controlled variable error,  $e_j$  is the error in the controlled variable and is calculated using Equation S8.

$$e_j = Z_{j, setpoint} - Z_{j, observed} \quad (S8)$$

Here,  $Z_{j, setpoint}$  is the setpoint value established for the control, and  $Z_{j, observed}$  is the measured value of the controlled variable.

### 1.3.2.2 Manipulated variable performance

The error presented in the simulations in the model is calculated using Equation S9 to Equation S14 [3].

$$\max(Dev_j^{MV}) = u_{j, \max} - u_{j, \min} \quad (S9)$$

$$\max(Dev_j^{\Delta u_j}) = \max(\Delta u_j) \quad (S10)$$

$$Var(\Delta u_j) = \overline{\Delta u_j^2} - (\overline{\Delta u_j})^2 \quad (S11)$$

$$\overline{\Delta u_j} = \frac{\int_{t_0}^{t_f} \Delta u_j dt}{t_f - t_0} \quad (S12)$$

$$\overline{\Delta u_j^2} = \frac{\int_{t_0}^{t_f} \Delta u_j^2 dt}{t_f - t_0} \quad (S13)$$

Here,  $\max(Dev_j^{MV})$  is the maximum deviation in the manipulated variable (MV),  $\max(Dev_j^{\Delta u_j})$  is the maximum deviation in the change in the manipulated variable,  $Var(\Delta u_j)$  is the variance in the change in the manipulated variable,  $u_j$  is the value of the manipulated variable, and  $\overline{\Delta u_j}$  is calculated using Equation S19.

$$\Delta u_j = |u_j(t + dt) - u_j(t)| \quad (S14)$$

### 1.3.3 Operational cost

The operational cost is evaluated using aeration energy (AE), pumping energy (PE), sludge production (SP), and methane production (METP). Equation S15 to Equation S18 are used to estimate the operational cost index (OC), which was adopted from [3].

$$OC = \gamma_1 AE + \gamma_1 PE + \gamma_2 SP \quad (S15)$$

Here,  $\gamma_1$ , and  $\gamma_2$  have values of 0.1 €/kWh [17,18], and 0.16 €/kg [18].

$$AE = \frac{S_O^{sat}}{1.8(1000)(t_f - t_0)} \int_{t_0}^{t_f} \sum_{i=1}^5 V_i(K_{Lai})(t) dt \quad (S16)$$

Here,  $S_O^{sat}$  is 8 mg/L, and  $V_i$  is the volume of the reactor.

$$PE = \frac{1}{t_f - t_0} \int_{t_0}^{t_f} (0.004Q_{ir}(t) + 0.008Q_r(t) + 0.05Q_w(t)) dt \quad (S17)$$

Here,  $Q_{ir}$  is the internal recycle flowrate,  $Q_r$  is the return sludge flowrate, and  $Q_w$  is the wastage flowrate.

$$SP = \frac{1}{t_f - t_0} \left( TSS_f - TSS_0 + 0.75 \left( \int_{t_0}^{t_f} (X_{S,e} + X_{I,e} + X_{B,H,e} + X_{B,A,e})(Q_e)(t) dt \right) \right) \quad (S18)$$

Here,  $X_{S,e}$  represents the parameter of particulate biodegradable organics in the effluent flow,  $X_{I,e}$  is the particulate undegradable organics,  $X_{B,H,e}$  is the active heterotrophic biomass, and  $X_{B,A,e}$  is the active autotrophic biomass.

$$METP = \frac{16(P_{atm})(13.89)}{25.62(t_f - t_0)} \left( \int_{t_0}^{t_f} \frac{Q_{gas}(t) \cdot p_{gas,CH_4}(t)}{P_{gas}(t)} dt \right) \quad (S19)$$

Here,  $P_{atm}$  represents the atmospheric pressure with a value of 1.013,  $Q_{gas}$  is the methane gas ( $CH_4$ ) flowrate,  $p_{gas,CH_4}$  is the methane gas pressure, and  $P_{gas}$  is the gas pressure considering  $CO_2$ ,  $H_2$ , and  $H_2O$ .

#### 1.4. Sensitivity analysis

Sensitivity analysis methods are classified in mathematical, statistical, and graphical. Mathematical sensitivity analysis assesses the output of a model to an input parameter with a variation range [19]. In the sensitivity analysis, the result shows a sensitivity ranking of the input parameters reflecting their influence on the model output [20]. Furthermore, scatter plots showing the input parameters versus the model output are utilized to represent the degree of correlation and linearity of the relationship between the input and output [20]. In the scatter plots, the metrics of rank correlation (Spearman's  $\rho$ ), rank partial correlation, and the rank standardized regression, are represented in a scale of -1 to 1. The rank correlation indicates the level of monotonicity between the input and output values of the samples and can be calculated using the Equation (S20) for Pearson correlation using rank transformed data, with linearized monotonic nonlinear relation between the variables [21].

$$\rho(a,b) = \frac{E(ab)}{\sigma_a \sigma_b} \quad (S20)$$

where  $\rho$  is the Pearson correlation coefficient,  $a$  and  $b$  are two zero-mean real-valued random variables,  $E(ab)$  is the cross-correlation of  $a$  and  $b$ , and  $\sigma_a \sigma_b$  are calculated from the variances of  $a$  and  $b$ , where  $\sigma_a^2 = E(a^2)$  and  $\sigma_b^2 = E(b^2)$ . Moreover, the rank partial correlation indicates the correlation between other input variables. Equation (S21) shows the calculation of the partial correlation coefficient [20].

$$r_{X_1Y|X_2} = \frac{r_{X_1Y} - r_{X_1X_2}r_{X_2Y}}{\sqrt{(1-r_{X_1X_2}^2)(1-r_{X_2Y}^2)}} \quad (S21)$$

where  $X_1$  and  $X_2$  are the input parameters,  $Y$  is the model output,  $r_{X_1Y|X_2}$  is the partial correlation coefficient for  $X_1$  and  $Y$  based on the effect of  $X_2$ . Moreover, the rank partial correlation indicates the correlation between other input variables. In addition, the rank standardized regression is derived from the rank regression, which utilizes matrix techniques to calculate the regression coefficients where the sensitivity of the parameters is evaluated in the regression equation. Monte Carlo simulation linear regression is commonly used to analyze the uncertainty of model outputs. The model structure is represented by  $f$ , state variables as  $x$ , input variables as  $u$ , parameters by  $P$ , and output vectors as  $y$  (Equation S22 to Equation S26) [22]. In the present study, the given variability of the input parameters is generated and implemented with MATLAB R2016a/Simulink.

$$\frac{dx}{dt} = f(x, u, t, P) \quad (S22)$$

$$x(t_0) = x_0 \quad (S23)$$

$$y = g(x(t)) \quad (S24)$$

This methodology consisted of the following steps: (a) specify input uncertainty, (b) sample input uncertainty, (c) run the simulation and, (d) use the sampling matrix  $\theta_i$ . Equation S25 and Equation S26 show the theoretical output regression from Monte Carlo simulations and its standardized coefficients  $\beta_i$ .

$$y_{reg} = a + \sum_i b_i \theta_i \quad (S25)$$

$$\beta_i = \frac{\sigma_{\theta_i}}{\sigma_y} b_i \quad (S26)$$

Here,  $b_i$  are the regression coefficients scaled with the standard deviation of the model input and output. The sensitivity coefficient  $b_i$  indicates a large effect of the corresponding output parameter in the regression when it takes a high absolute value; when the value is negative and positive, it represents a negative effect, and positive effect, respectively. However, when the value is zero, the output is not sensitive to the parameter, presenting a negligible relationship [22].

Thus, the rank standardized regression removes the influence of the different units of the parameters, placing them on the same level. Equation (S27) shows the calculation of the rank standardized regression.

$$\left( \frac{\hat{Y} - \bar{Y}}{s} \right) = \sum_k \left[ \frac{b_k s_k}{s} \right] \left( \frac{(Z_k - \bar{Z}_k)}{s_k} \right) \quad (\text{S27})$$

where  $Z_k$  is a function of the input parameters  $X_1, \dots, X_n$ ,  $s$  is the standardized deviation of  $Y$ , and  $s_k$  is the standard deviation of the input parameters. In general, both the rank regression and the rank standardized regression are similar exhibiting the same type of sensitivity ranking in numerical values [20].

### 1.5. Controllers

Process control is the methodology for constraining the process output by manipulating a chosen variable [23]. Proportional-Integrative-Derivative (PID) controllers (Figure S1) are commonly used in industrial processes, and are structured as shown Equation S28 to Equation S31:

$$u_p(t) = k_c (y_s(t) - y(t)) \quad (\text{S28})$$

$$u_I(t) = \frac{k_c}{\tau_i} \int_0^t (y_s(\tau) - y(\tau)) d\tau \quad (\text{S29})$$

$$u_D(t) = k_c \tau_d \frac{d(y_s(t) - y(t))}{dt} \quad (\text{S30})$$

Here,  $y_s(t)$  represents the setpoint,  $y(t)$  is the process output,  $k_c$  is the proportional gain,  $\tau_i$  is the integral time,  $\tau_d$  is the derivative time.  $u_p(t)$ ,  $u_i(t)$ ,  $u_d(t)$  are considered in the PID controller general equation:

$$u(t) = u_p(t) + u_i(t) + u_d(t) \quad (S31)$$

where  $u(t)$  is the control output. System identification is necessary for controllers since the process output may deviate from the normal steady state with the open loop identification method. The system identification may be carried out with a signal test like a simple set point change in PID or a step response, as is utilized in this study. First, the process is activated (process input and output present the required information). Second, the integral transform is used to convert the parametric differential equation. Finally, a least square method is used for estimating model parameters from the measured process data [23]. A mathematical representation of the transfer function of the process may be defined as in Equation S32:

$$Gp(s) = \frac{y(s)}{u(s)} = \frac{b_ms^m + b_{m-1}s^{m-1} + \dots + b_1s + b_0}{a_ns^n + a_{n-1}s^{n-1} + \dots + a_1s + 1} \quad (S32)$$

where  $Gp(s)$  represents the transfer function of the process,  $y(s)$  is the process output,  $u(s)$  is the Laplace transform of the process input (controller output), and  $m \leq n$ . Then, the process model is tuned with the Ziegler-Nichols method [23]. The software utilized for simulating this control model is MATLAB R2016a/Simulink, which is a block diagram environment integrated in MATLAB that supports simulation and code generation among other functionalities.

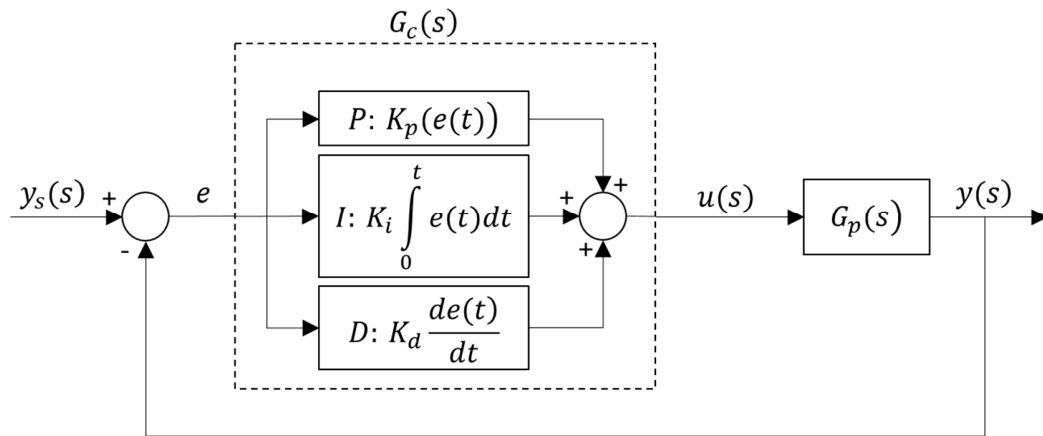

Figure S3. General layout of a PID controller [5].

### 1.5.1. Model predictive control

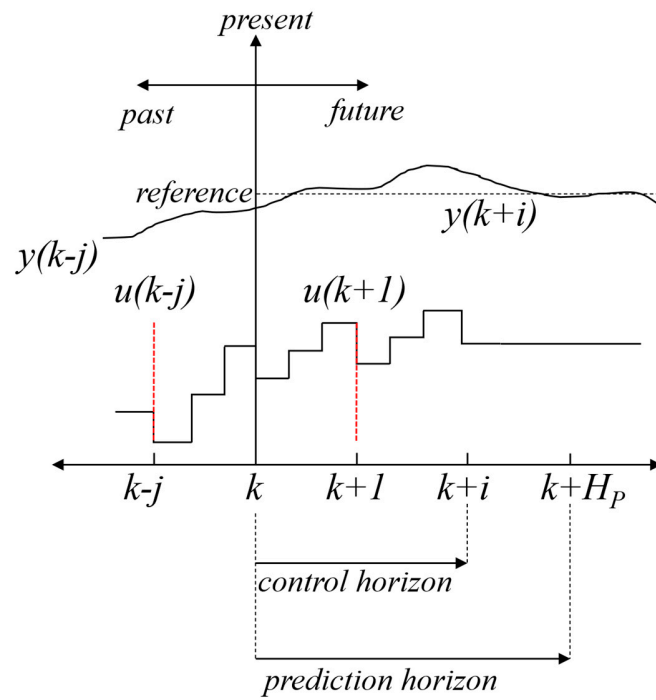

Figure S4. Receding horizon principle of MPC. Adapted from [24,25].

### 1.5.2. Control strategy scenarios C1 and C2

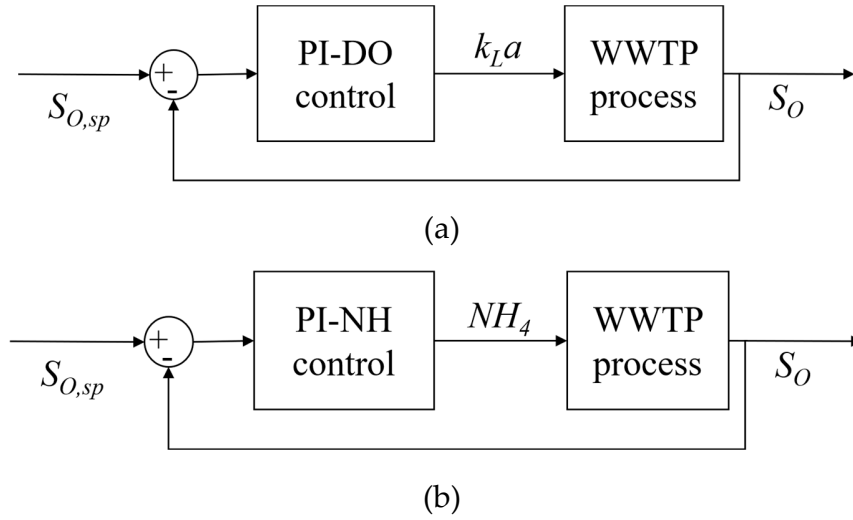

Figure S5. Block diagram of the proposed single loop control strategy (scenario C1 and C2). (a) The control loop calculates the dissolved oxygen concentration ( $S_O$ ) at the set point given  $S_{O,sp}$ , and tracks the  $S_O$  set point by adjusting the  $k_L a$  of the system. (b) The control loop compensates the errors of  $S_O$  measurement to attain to the desired  $NO_2/NH_4$  ratio.

### References

1. Alex, J.; Beteau, J.F.; Copp, J.B.; Hellinga, C.; Jeppsson, U.; Marsili-Libelli, S.; Pons, M.N.; Spanjers, H.; Vanhooren, H. Benchmark for Evaluating Control Strategies in Wastewater Treatment Plants. *Eur. Control Conf. ECC 1999 - Conf. Proc.* **2015**, 3746–3751.
2. Volcke, E.I.P.; Vanrolleghem, P.; van Loosdrecht, M.C.M. Modelling, Analysis and Control of Partial Nitrification in a SHARON Reactor, 2006.
3. Alex, J.; Benedetti, L.; Copp, J.; Gernaey, K. V; Jeppsson, U.; Nopens, I.; Pons, M.; Rieger, L.; Rosen, C.; Steyer, J.P.; et al. *Benchmark Simulation Model No. 2 (BSM2) Report*; 2008;
4. Jeppsson, U.; Pons, M.N. The COST Benchmark Simulation Model-Current State and Future Perspective. *Control Eng. Pract.* **2004**, 12, 299–304, doi:10.1016/j.conengprac.2003.07.001.



5. Vilela, P.; Liu, H.; Lee, S.; Hwangbo, S.; Nam, K.; Yoo, C. A Systematic Approach of Removal Mechanisms, Control and Optimization of Silver Nanoparticle in Wastewater Treatment Plants. *Sci. Total Environ.* **2018**, 633, doi:10.1016/j.scitotenv.2018.03.247.
6. Henze, M.; Grady, C.; Gujer, W.; Marais, G.; Matsuo, T. Activated Sludge Model No. 1. *IAWPRC Sci. Tech. Reports* **1987**, 1.
7. Valverde-Pérez, B.; Mauricio-Iglesias, M.; Sin, G. Modelling and Control Design for SHARON / Anammox Reactor Sequence. In Proceedings of the Proceedings of the 17th Nordic Process Control Workshop; 2012.
8. Valverde-Pérez, B.; Mauricio-Iglesias, M.; Sin, G. Systematic Design of an Optimal Control System for the SHARON-Anammox Process. *J. Process Control* **2016**, doi:10.1016/j.jprocont.2015.12.009.
9. Iacopozzi, I.; Innocenti, V.; Marsili-Libelli, S.; Giusti, E. A Modified Activated Sludge Model No. 3 (ASM3) with Two-Step Nitrification-Denitrification. *Environ. Model. Softw.* **2007**, doi:10.1016/j.envsoft.2006.05.009.
10. Henze, M.; Gujer, W.; Mino, T.; Loosdrecht, M. van Activated Sludge Models AS. **2000**.
11. Bozkurt, H.; Quaglia, A.; Gernaey, K. V; Sin, G. Environmental Modelling & Software A Mathematical Programming Framework for Early Stage Design of Wastewater Treatment Plants. *Environ. Model. Softw.* **2015**, 64, 164–176, doi:10.1016/j.envsoft.2014.11.023.
12. Ostace, G.S.; Cristea, V.M.; Agachi, P.Ş. Cost Reduction of the Wastewater Treatment Plant Operation by MPC Based on Modified ASM1 with Two-Step Nitrification/Denitrification Model. *Comput. Chem. Eng.* **2011**, 35, 2469–2479, doi:10.1016/j.compchemeng.2011.03.031.
13. Giusti, E.; Marsili-libelli, S.; Spagni, A. Environmental Modelling & Software Modelling Microbial Population Dynamics in Nitritation Processes. *Environ. Model. Softw.* **2011**, 26, 938–949, doi:10.1016/j.envsoft.2011.02.001.
14. Montgomery, D.C.; Runger, G.C.; Hubele, N.F. *Engineering Statistics*; 2011;
15. COST European Cooperation of Scientific and Technical Research *The COST Simulation Benchmark: Description and Simulator Manual*; 1998;
16. Kim, M.; Rao, A.S.; Yoo, C. Dual Optimization Strategy for N and P Removal in a Biological Wastewater Treatment Plant. *Ind. Eng. Chem. Res.* **2009**, 48, 6363–6371, doi:10.1021/ie801689t.

17. Guerrero, J.; Guisasola, A.; Vilanova, R.; Baeza, J.A. Improving the Performance of a WWTP Control System by Model-Based Setpoint Optimisation. *Environ. Model. Softw.* **2011**, *26*, 492–497, doi:10.1016/j.envsoft.2010.10.012.
18. Ostace, G.S.; Baeza, J.A.; Guerrero, J.; Guisasola, A.; Cristea, V.M.; Agachi, P.Ş.; Lafuente, J. Development and Economic Assessment of Different WWTP Control Strategies for Optimal Simultaneous Removal of Carbon, Nitrogen and Phosphorus. *Comput. Chem. Eng.* **2013**, *53*, 164–177, doi:10.1016/j.compchemeng.2013.03.007.
19. Frey, H.C.; Patil, S.R. Identification and Review of Sensitivity Analysis Methods. *Risk Anal.* **2002**, *22*, 553–578.
20. Hamby, D.M. A Review of Techniques for Parameter Sensitivity. *Environ. Monit. Assess.* **1994**, *32*, 135–154.
21. Benesty J., Chen J., Huang Y., C.I. Pearson Correlation Coefficient. In: Noise Reduction in Speech Processing. *Encycl. Syst. Biol.* **2009**.
22. Sin, G.; Gernaey, K. V.; Neumann, M.B.; van Loosdrecht, M.C.M.; Gujer, W. Global Sensitivity Analysis in Wastewater Treatment Plant Model Applications: Prioritizing Sources of Uncertainty. *Water Res.* **2011**, *45*, 639–651, doi:10.1016/j.watres.2010.08.025.
23. Sung, S.W.; Lee, J.; Lee, I.-B. *Process Identification and PID Control*; 2009;
24. Weijers, S.R.; Preisig, H.A. Robustness Analysis of Model Predictive Control of Activated Sludge Plants. *IFAC Proc. Vol.* **2000**, *33*, 545–550, doi:10.1016/s1474-6670(17)38597-x.
25. Tang, X.; Sun, Y.; Zhou, G.; Miao, F. Coordinated Control of Multi-Type Energy Storage for Wind Power Fluctuation Suppression. *Energies* **2017**, *10*, 1–17, doi:10.3390/en10081212.
